# Supplementary material for: Hypocretinergic interactions with the serotonergic system regulate REM sleep and cataplexy
Source: PubMed Central journal article supplement (PMC7699625; doi:10.1038/s41467-020-19862-y), 2020-11-27
Supplement: 41467_2020_19862_MOESM1_ESM.pdf [file 41467_2020_19862_MOESM1_ESM.pdf]

# **Hypocretinergic interactions with the serotonergic system regulate REM sleep and cataplexy**

Ali Seifinejad, Sha Li, Marie-Laure Possovre, Anne Vassalli<sup>1\*</sup>, and Mehdi Tafti<sup>1\*</sup>

Department of Biomedical Sciences, Faculty of Biology and Medicine, University of Lausanne, 1005 Lausanne, Switzerland

<sup>1</sup>These authors contributed equally

**\*Corresponding Authors:** Prof. Mehdi Tafti, Department of Biomedical Sciences, Faculty of Biology and Medicine, University of Lausanne, Rue du Bugnon 7, 1005 Lausanne, Switzerland, Phone:+41215923971, Fax: +41216925505, email: [mehdi.tafti@unil.ch](mailto:mehdi.tafti@unil.ch).

Dr. Anne Vassalli, Department of Biomedical Sciences, Faculty of Biology and Medicine, University of Lausanne, Rue du Bugnon 7, 1005 Lausanne, Switzerland, email: [anne.vassalli@unil.ch](mailto:anne.vassalli@unil.ch).

**Keywords:** Narcolepsy, lateral hypothalamus, dorsal raphe, serotonin transporter

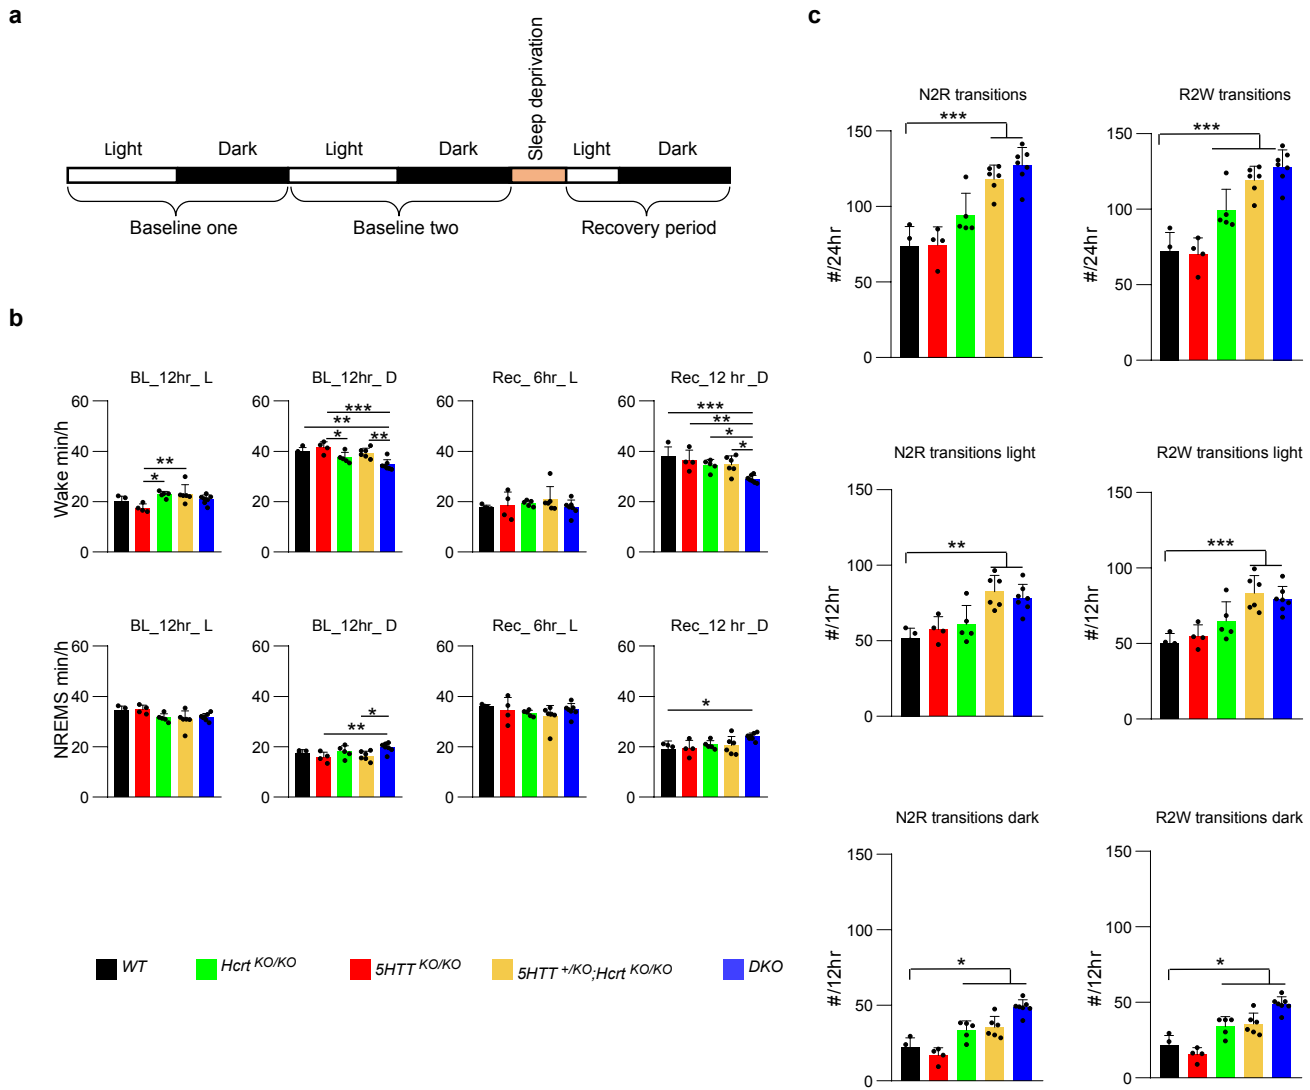

**Supplementary Fig. 1.** **a** Schematic figure representing the experimental procedure. **b** Total amount of wakefulness and NREMS across genotypes during light and dark periods (one-way ANOVA, genotype F (4,21) = 4.49 (wake, BL light,  $P < 0.01$ ), 9.94 (wake, BL dark,  $P < 0.001$ ), 0.73 (wake, Rec light,  $P > 0.5$ ) and 7.35 (wake, Rec dark,  $P < 0.001$ ), 3.1 (NREM, BL light,  $P < 0.05$ ), 3.6 (NREM, BL dark,  $P < 0.05$ ), 1.05 (NREM, Rec light,  $P > 0.4$ ) and 3.23 (NREM, Rec dark,  $P < 0.05$ ) followed by Tukey test, mean  $\pm$  SD. L: light, D: dark, BL: baseline, Rec: recovery **c** Number of NREMS to REMS (N2R) and REMS to Wake (R2W) state transitions across genotypes and during light and dark periods. L: light, D: dark, BL: baseline, Rec: recovery. Values are mean  $\pm$  SD (one-way ANOVA, genotype F (4, 21) = 21.59 (N2R-24hr), 26.3 (R2W-24hr), 9.5 (N2R-light), 10.8 (R2W-light), 23.6 (N2R-dark), and 24.9 (R2W-dark),  $P < 0.0001$ , followed by Tukey test). For b and c \*  $P < 0.05$ ; \*\*  $P < 0.01$ ; \*\*\*  $P < 0.001$ .



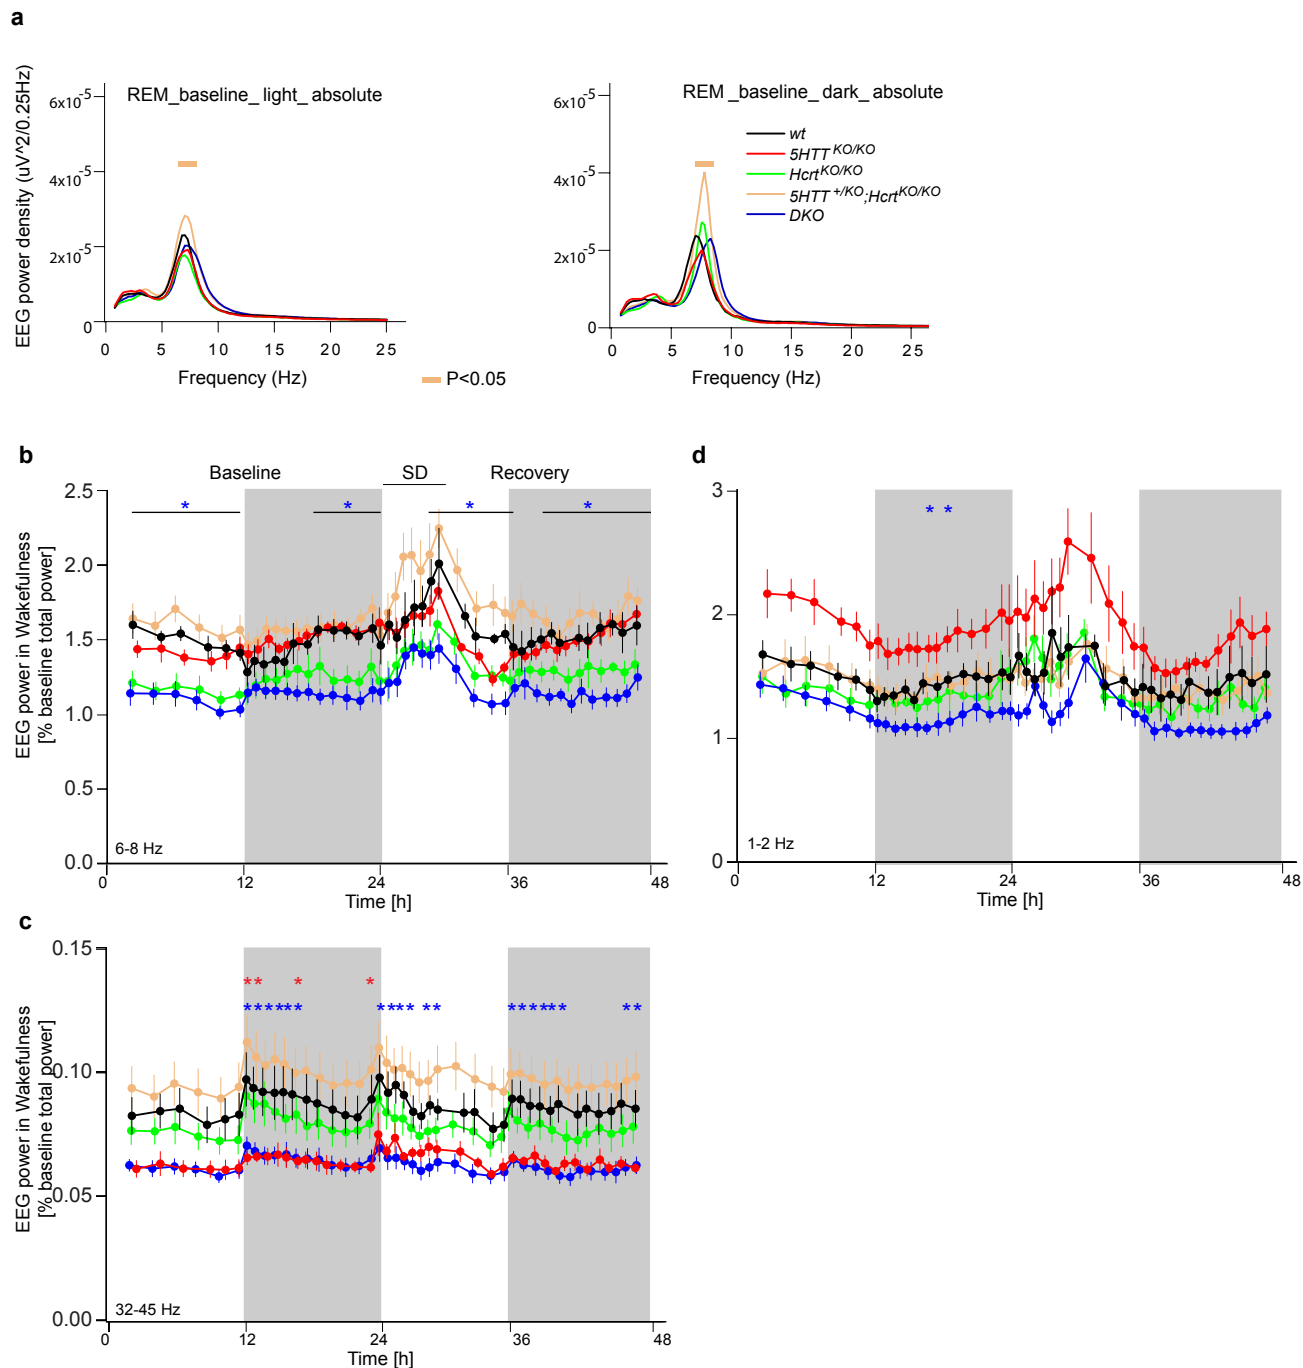

**Supplementary Fig. 2.** **a** Absolute baseline REMS EEG power spectra among genotypes during light (left) and dark (right) periods (two-way ANOVA, interaction frequency x genotype  $F(388, 2037) = 1.59$  (light),  $3.3$  (dark),  $P < 0.0001$ , followed by Dunnett's test). **b** Time-course dynamics of the theta (6-8 Hz) EEG power in wakefulness (two-way ANOVA, interaction time x genotype  $F(164, 861) = 1.83$ ,  $P < 0.0001$ , followed by Dunnett's test, mean  $\pm$  SD). **c** Time-course dynamics of the slow-gamma (32-45 Hz) EEG power in wakefulness (two-way ANOVA, genotype  $F(4, 21) = 5.66$ ,  $P < 0.01$ , followed by Dunnett's test, mean  $\pm$  SD). **d** Time-course dynamics of the slow-delta (1-2 Hz) EEG power in wakefulness (two-way ANOVA, genotype  $F(4, 21) = 5.04$ ,  $P < 0.01$ , followed by Dunnett's test, mean  $\pm$  SD), WT vs *5HTT<sup>+/-KO</sup>;Hcrt<sup>KO/KO</sup>* \*, *DKO* \*, *5HTTKO/KO* \*, *HcrtKO/KO* \*  $P < 0.05$ .

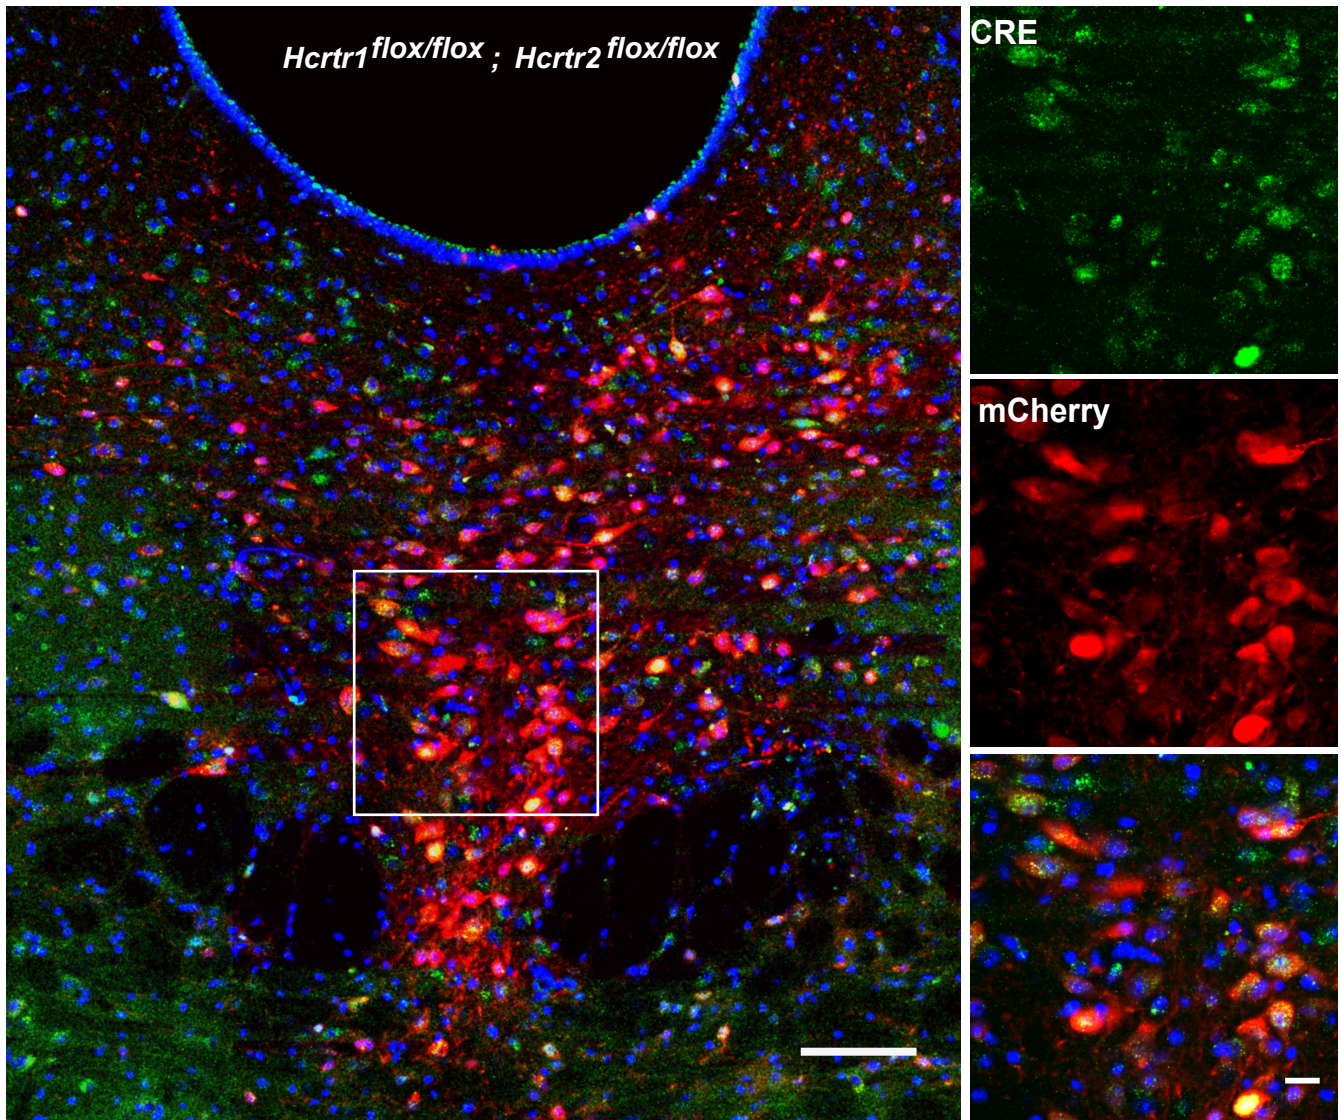

**Supplementary Fig. 3.** Colocalization of mCHERRY and Cre expression in the DR of HCRTr1&2 flox/flox mice. Representative confocal image of the DR of Hcrtr1&2 double-floxed homozygous mice injected with AAV-EF1a-mCherry-IRES-Cre-WPRE and stained with mCHERRY (red) and Cre (green) antibodies. mCHERRY-positive cells (red) are highly co-localized with Cre-positive cells (green). Higher magnification (40X, right) indicates substantial Cre expression in mCHERRY-positive cells. Scale bars: main 100  $\mu$ m, magnification 20  $\mu$ m.

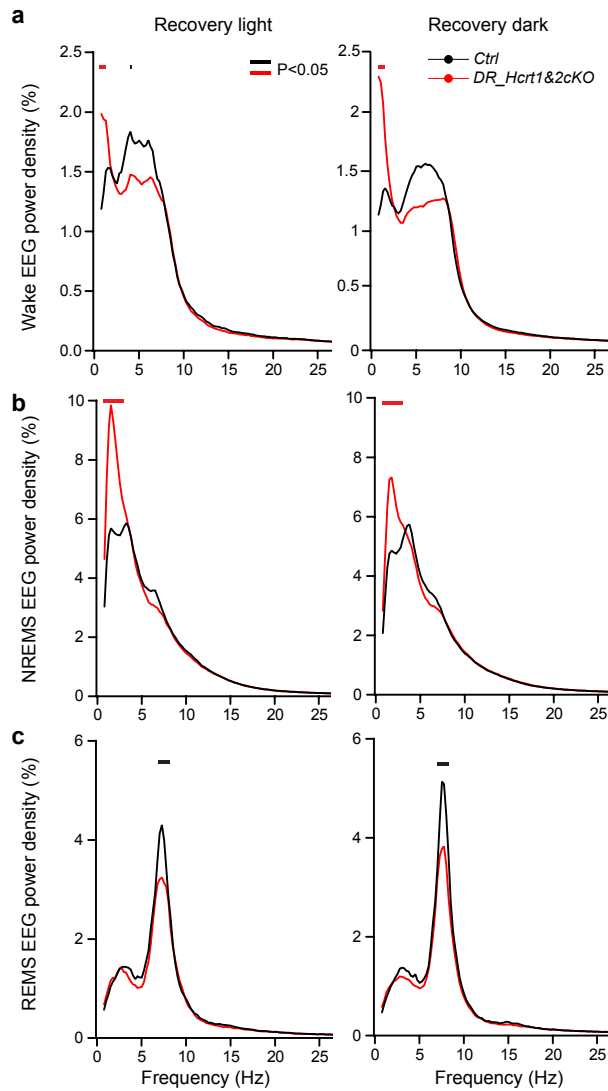

**Supplementary Fig. 4.** Alterations in vigilance states EEG power spectra in DR Hcrt1&2 gene-inactivated mice. **a** Waking EEG power spectra during light (left) and dark (right) periods during recovery. The data are normalized to the total EEG power during baseline. **b** EEG power spectra for NREMS during recovery. **c** EEG power spectra for REMS during recovery. Values are mean  $\pm$  SEM (two-way ANOVA, frequency  $\times$  genotype  $F(196, 1568) = 3.05$  (wake light),  $5.63$  (NREMS light),  $1.85$  (REMS light),  $2.7$  (wake dark),  $2.39$  (NREMS dark) and  $4.75$  (REMS dark),  $P < 0.0001$ , followed by Dunnett's test,  $P < 0.05$ ).

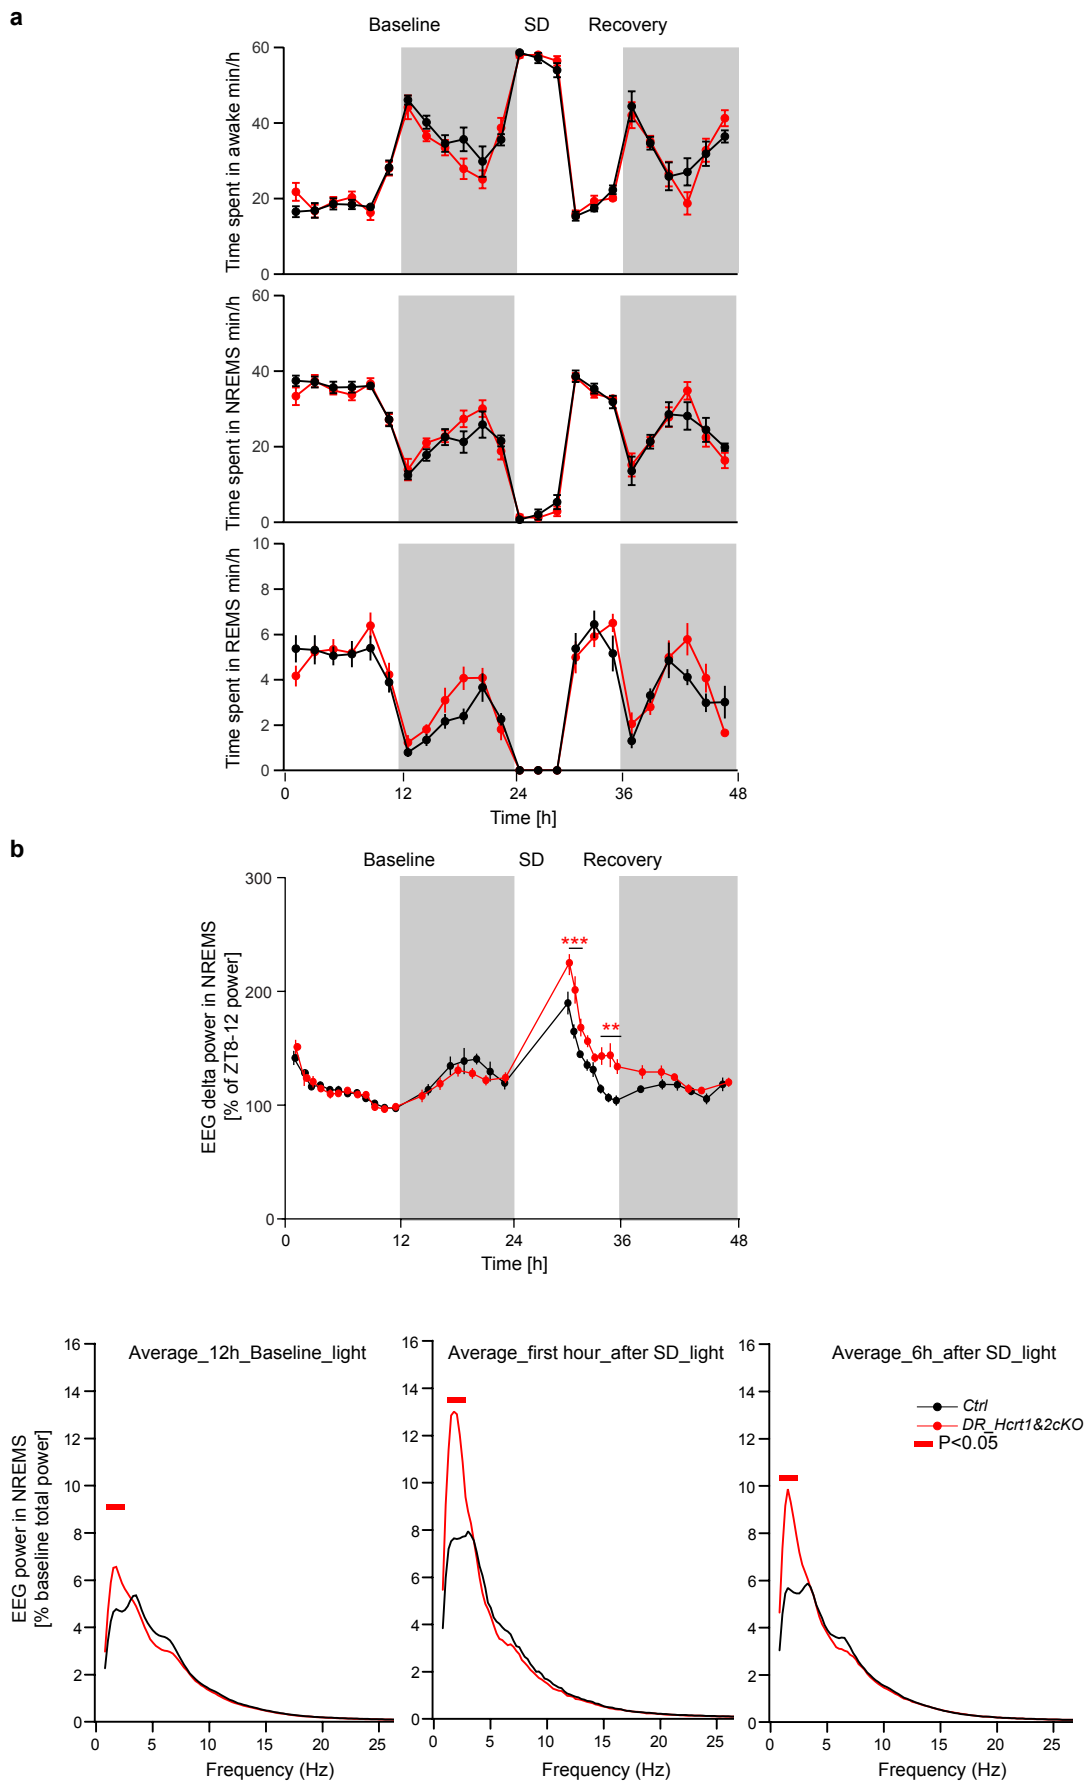

**Supplementary Fig. 5. a** Time-course distribution of vigilance states after inactivation of Hcrt1&2 in the DR, Wakefulness (top), NREMS (middle) and REMS (bottom). Data points are shown in minutes spent in each state per 1 hour interval. Baseline represents the average of 2 days of recordings before sleep deprivation (SD), (DR\_Hcrt1&2-cKO n=5, and control mice n=5, mean  $\pm$  SEM). **b** Time-course of the EEG delta power (top, two-way ANOVA, interaction time x genotype F (31, 248) = 3.69, P < 0.0001, followed by Dunnett's test, \*\* P < 0.01; \*\*\* P < 0.001, and total EEG power (bottom) in 12 hours baseline, first hour after SD and 6 hours after SD. Values are mean  $\pm$  SEM (two-way ANOVA, interaction frequency x genotype F (196, 1568) = 2.26 (left), 3.90 (middle), and 5.63 (right), P < 0.0001, followed by Dunnett's test).
